# Supplementary material for: Identification of Novel Components Influencing Colonization Factor Antigen I Expression in Enterotoxigenic Escherichia coli
Source: PubMed Central journal article supplement (PMC4627747; doi:10.1371/journal.pone.0141469), 2015-10-30
Supplement: pone.0141469.s001.pdf [file pone.0141469.s001.pdf]

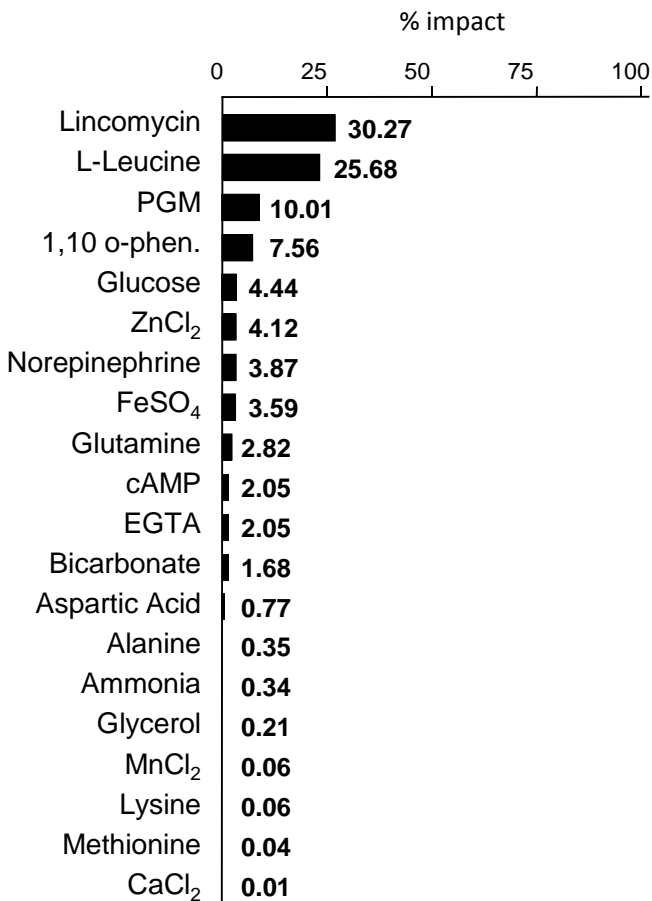

**Figure S1. Component effect on the variability of the CFA/I response.** Pareto distribution diagram showing the percent impact of each component on CFA/I surface expression.
