# Supplementary material for: Identification of Novel Components Influencing Colonization Factor Antigen I Expression in Enterotoxigenic Escherichia coli
Source: PubMed Central journal article supplement (PMC4627747; doi:10.1371/journal.pone.0141469), 2015-10-30
Supplement: pone.0141469.s002.pdf [file pone.0141469.s002.pdf]

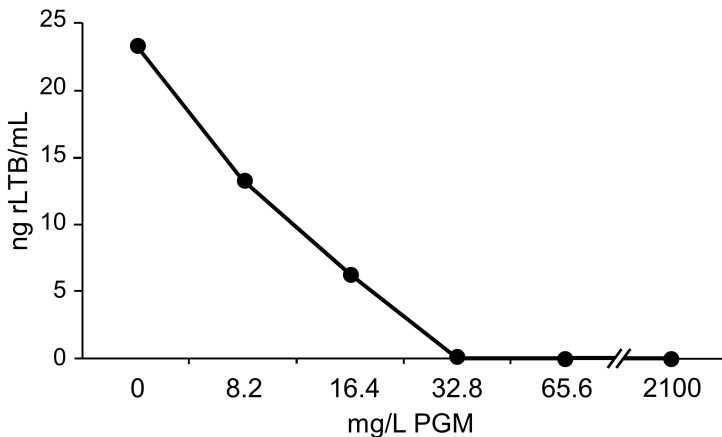

**Figure S2. Concentration dependent LTB epitope masking by PGM.** 20 ng/mL recombinant LTB (rLTB) was incubated in SP1 culture media containing 0 to 2100 mg/L PGM for 1 hour before LTB quantification by GM1 ELISA.
