# Supplementary material for: Identification of Novel Components Influencing Colonization Factor Antigen I Expression in Enterotoxigenic Escherichia coli
Source: PubMed Central journal article supplement (PMC4627747; doi:10.1371/journal.pone.0141469), 2015-10-30
Supplement: pone.0141469.s003.pdf [file pone.0141469.s003.pdf]

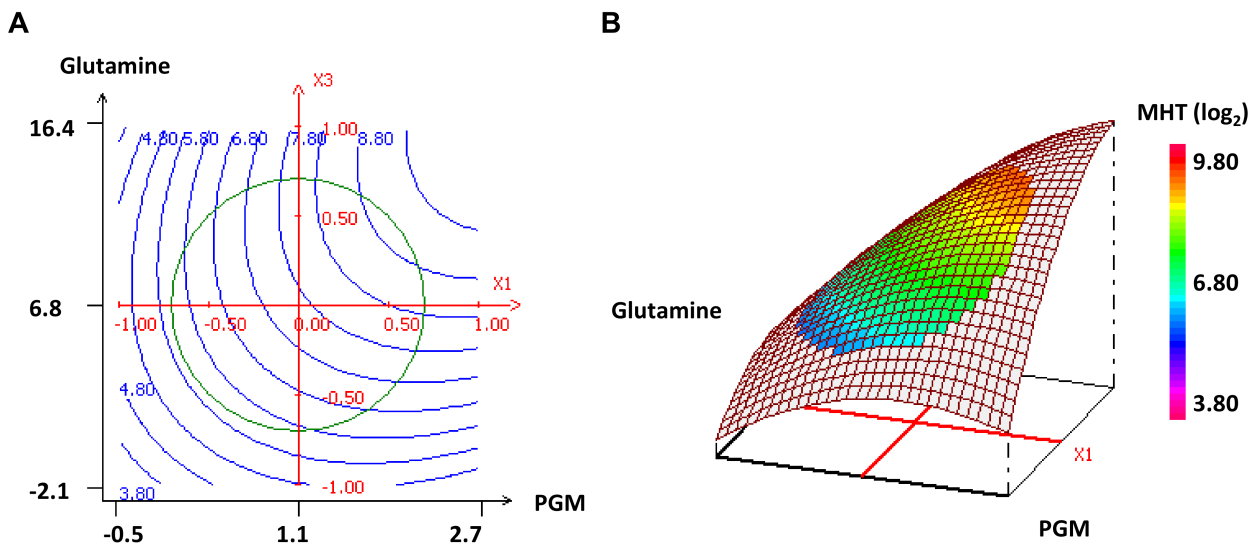

**Figure S3. Effect of the interaction between glutamine and PGM on the CFA/I response.** 2-dimensional (A) and 3-dimensional (B) representation of the interaction between glutamine (mM) and PGM (g/L) on CFA/I surface expression as determined by MRHA. MHT titers are indicated by blue lines (A) or color code (B), with the optimum corresponding to the highest titer induced by the interaction.
