# Supplementary material for: Identification of Novel Components Influencing Colonization Factor Antigen I Expression in Enterotoxigenic Escherichia coli
Source: PubMed Central journal article supplement (PMC4627747; doi:10.1371/journal.pone.0141469), 2015-10-30
Supplement: pone.0141469.s005.pdf [file pone.0141469.s005.pdf]

**Table S1: Hadamard matrix with endpoints**

| Experiment      | Components tested |          |     |            |        |               |           |         |         |                   |                   |                   |                   |                    |                    |        |            |      |      |               | Endpoint results         |                     |                           |          |
|-----------------|-------------------|----------|-----|------------|--------|---------------|-----------|---------|---------|-------------------|-------------------|-------------------|-------------------|--------------------|--------------------|--------|------------|------|------|---------------|--------------------------|---------------------|---------------------------|----------|
|                 | Glucose           | Glycerol | PGM | Methionine | Lysine | Aspartic Acid | Glutamine | Alanine | Leucine | MnCl <sub>2</sub> | CaCl <sub>2</sub> | ZnCl <sub>2</sub> | FeSO <sub>4</sub> | NH <sub>4</sub> Cl | NaHCO <sub>3</sub> | Norep. | Lincomycin | cAMP | EGTA | 1, 10 o-phen. | MHT (log <sub>2</sub> )* | Secreted LT (pg/OD) | Bacterial density (OD/mL) | Final pH |
|                 | %                 | %        | g/L | g/L        | g/L    | g/L           | g/L       | g/L     | g/L     | μM                | μM                | μM                | μM                | mM                 | μM                 | μM     | μg/mL      | μM   | mM   | μM            |                          |                     |                           |          |
| 1               | 0.5               | 0        | 1   | 1          | 0      | 0             | 1         | 1       | 0       | 40                | 50                | 25                | 0                 | 9.5                | 0                  | 0      | 45         | 50   | 0.5  | 5             | 6                        | 3.49                | 4.56                      | 7.56     |
| 2 <sup>a</sup>  | 0.5               | 0.2      | 1   | 1          | 1      | 0             | 1         | 0       | 1       | 0                 | 50                | 25                | 25                | 9.5                | 0                  | 25     | 0          | 0    | 0    | 0             | 2                        | 46.24               | 6.70                      | 6.71     |
| 3               | 0.1               | 0.2      | 0   | 1          | 1      | 0             | 0         | 1       | 1       | 0                 | 900               | 0                 | 25                | 9.5                | 0                  | 0      | 0          | 50   | 0.5  | 5             | 0                        | 226.19              | 2.90                      | 6.69     |
| 4 <sup>b</sup>  | 0.1               | 0.2      | 0   | 0          | 0      | 0             | 1         | 1       | 1       | 40                | 50                | 25                | 0                 | 50                 | 22.5               | 0      | 0          | 50   | 0    | 0             | 0                        | 45.24               | 1.26                      | 7.77     |
| 5               | 0.5               | 0.2      | 0   | 0          | 1      | 1             | 0         | 0       | 1       | 40                | 50                | 0                 | 0                 | 9.5                | 22.5               | 25     | 45         | 50   | 0    | 5             | 1                        | 357.89              | 1.66                      | 6.67     |
| 6               | 0.5               | 0.2      | 1   | 1          | 0      | 1             | 0         | 1       | 1       | 0                 | 900               | 25                | 0                 | 9.5                | 22.5               | 0      | 45         | 0    | 0    | 0             | 6                        | 9.76                | 6.27                      | 7.08     |
| 7 <sup>c</sup>  | 0.1               | 0        | 1   | 1          | 0      | 0             | 1         | 0       | 1       | 0                 | 50                | 0                 | 25                | 50                 | 22.5               | 25     | 45         | 50   | 0    | 5             | 3                        | 146.90              | 0.83                      | 8.34     |
| 8               | 0.5               | 0        | 0   | 1          | 1      | 0             | 0         | 1       | 0       | 0                 | 50                | 0                 | 0                 | 50                 | 22.5               | 25     | 45         | 0    | 0.5  | 0             | 0                        | NA                  | 0.00                      | NA       |
| 9               | 0.1               | 0.2      | 1   | 1          | 1      | 1             | 0         | 1       | 0       | 40                | 50                | 0                 | 25                | 50                 | 0                  | 0      | 45         | 50   | 0    | 0             | 8                        | 19.18               | 3.20                      | 7.75     |
| 10              | 0.5               | 0.2      | 0   | 1          | 0      | 1             | 1         | 0       | 0       | 40                | 50                | 0                 | 25                | 9.5                | 22.5               | 0      | 0          | 0    | 0.5  | 5             | 6                        | 64.10               | 5.48                      | 6.50     |
| 11              | 0.5               | 0.2      | 0   | 0          | 1      | 0             | 1         | 0       | 0       | 0                 | 900               | 25                | 25                | 50                 | 22.5               | 0      | 45         | 50   | 0.5  | 0             | 8                        | 42.58               | 2.60                      | 6.37     |
| 12              | 0.1               | 0.2      | 0   | 1          | 0      | 0             | 0         | 0       | 1       | 40                | 900               | 25                | 0                 | 50                 | 0                  | 25     | 45         | 0    | 0.5  | 5             | 0                        | 16.00               | 2.35                      | 6.19     |
| 13              | 0.1               | 0        | 0   | 0          | 0      | 0             | 0         | 0       | 0       | 0                 | 50                | 0                 | 0                 | 9.5                | 0                  | 0      | 0          | 0    | 0    | 0             | 2                        | 97.14               | 0.77                      | 7.12     |
| 14 <sup>d</sup> | 0.1               | 0.2      | 1   | 0          | 0      | 1             | 1         | 0       | 0       | 0                 | 900               | 0                 | 0                 | 9.5                | 0                  | 25     | 45         | 50   | 0.5  | 0             | 8                        | 29.47               | 3.40                      | 7.60     |
| 15 <sup>a</sup> | 0.5               | 0.2      | 1   | 1          | 1      | 0             | 1         | 0       | 1       | 0                 | 50                | 25                | 25                | 9.5                | 0                  | 25     | 0          | 0    | 0    | 0             | 2                        | 10.83               | 6.65                      | 6.75     |
| 16              | 0.1               | 0.2      | 1   | 0          | 0      | 1             | 0         | 1       | 0       | 0                 | 50                | 25                | 25                | 50                 | 22.5               | 25     | 0          | 0    | 0.5  | 5             | 3                        | 12.60               | 4.05                      | 8.66     |
| 17              | 0.5               | 0        | 0   | 0          | 0      | 1             | 1         | 1       | 1       | 0                 | 900               | 0                 | 25                | 50                 | 0                  | 0      | 45         | 0    | 0    | 5             | 4                        | 636.60              | 2.54                      | 6.32     |
| 18              | 0.1               | 0        | 0   | 1          | 1      | 1             | 1         | 1       | 0       | 0                 | 900               | 25                | 0                 | 9.5                | 22.5               | 25     | 0          | 50   | 0    | 5             | 0                        | 503.67              | 0.28                      | 8.03     |
| 19 <sup>e</sup> | 0.5               | 0.2      | 1   | 0          | 1      | 0             | 1         | 1       | 0       | 40                | 900               | 0                 | 0                 | 50                 | 0                  | 25     | 0          | 0    | 0    | 5             | 4                        | 218.09              | 4.59                      | 6.12     |
| 20 <sup>b</sup> | 0.1               | 0.2      | 0   | 0          | 0      | 0             | 1         | 1       | 1       | 40                | 50                | 25                | 0                 | 50                 | 22.5               | 0      | 0          | 50   | 0    | 0             | 0                        | 149.34              | 1.91                      | 7.22     |
| 21              | 0.1               | 0        | 0   | 0          | 1      | 1             | 1         | 1       | 1       | 40                | 50                | 25                | 25                | 9.5                | 0                  | 25     | 45         | 0    | 0.5  | 0             | 4                        | 73.42               | 2.23                      | 8.36     |
| 22              | 0.5               | 0        | 1   | 0          | 0      | 0             | 0         | 1       | 1       | 40                | 900               | 0                 | 25                | 9.5                | 22.5               | 25     | 0          | 50   | 0.5  | 0             | 3                        | 8.40                | 6.34                      | 7.93     |
| 23              | 0.1               | 0        | 1   | 1          | 1      | 1             | 1         | 0       | 1       | 40                | 900               | 0                 | 0                 | 50                 | 22.5               | 0      | 0          | 0    | 0.5  | 0             | 3                        | 0.00                | 2.37                      | 8.79     |
| 24 <sup>f</sup> | 0.1               | 0        | 1   | 0          | 1      | 0             | 0         | 0       | 0       | 40                | 900               | 25                | 25                | 9.5                | 22.5               | 0      | 45         | 0    | 0    | 5             | 6                        | 119.47              | 0.84                      | 8.41     |
| 25              | 0.5               | 0        | 0   | 1          | 0      | 1             | 0         | 0       | 0       | 40                | 900               | 25                | 25                | 50                 | 0                  | 25     | 0          | 50   | 0    | 0             | 1                        | 0.00                | 1.66                      | 4.90     |
| 26 <sup>f</sup> | 0.1               | 0        | 1   | 0          | 1      | 0             | 0         | 0       | 0       | 40                | 900               | 25                | 25                | 9.5                | 22.5               | 0      | 45         | 0    | 0    | 5             | 6                        | 84.48               | 0.76                      | 8.58     |
| 27              | 0.5               | 0        | 1   | 0          | 1      | 1             | 0         | 0       | 1       | 0                 | 50                | 25                | 0                 | 50                 | 0                  | 0      | 0          | 50   | 0.5  | 5             | 0                        | 54.55               | 3.40                      | 7.04     |
| 28 <sup>c</sup> | 0.1               | 0        | 1   | 1          | 0      | 0             | 1         | 0       | 1       | 0                 | 50                | 0                 | 25                | 50                 | 22.5               | 25     | 45         | 50   | 0    | 5             | 3                        | 205.34              | 0.82                      | 8.36     |
| 29 <sup>d</sup> | 0.1               | 0.2      | 1   | 0          | 0      | 1             | 1         | 0       | 0       | 0                 | 900               | 0                 | 0                 | 9.5                | 0                  | 25     | 45         | 50   | 0.5  | 0             | 7                        | 34.31               | 3.53                      | 7.69     |
| 30 <sup>e</sup> | 0.5               | 0.2      | 1   | 0          | 1      | 0             | 1         | 1       | 0       | 40                | 900               | 0                 | 0                 | 50                 | 0                  | 25     | 0          | 0    | 0    | 5             | 3                        | 3.93                | 4.18                      | 6.90     |

<sup>a-f</sup> indicate duplicates

\*MHT indicates minimal hemagglutination titer detected by MRHA
