# Supplementary material for: Identification of Novel Components Influencing Colonization Factor Antigen I Expression in Enterotoxigenic Escherichia coli
Source: PubMed Central journal article supplement (PMC4627747; doi:10.1371/journal.pone.0141469), 2015-10-30
Supplement: pone.0141469.s006.pdf [file pone.0141469.s006.pdf]

**Table S2. Response surface matrix with endpoints**

| Experiment      | Components tested |             |                |                        |                    |           |            | Endpoint results         |                           |          |
|-----------------|-------------------|-------------|----------------|------------------------|--------------------|-----------|------------|--------------------------|---------------------------|----------|
|                 | PGM (g/L)         | Glucose (%) | Glutamine (mM) | FeSO <sub>4</sub> (μM) | Lincomycin (μg/mL) | EGTA (mM) | pH (units) | MHT* (log <sub>2</sub> ) | Bacterial density (OD/mL) | Final pH |
| 1 <sup>a</sup>  | 0.4               | 0.4         | 8.4            | 87.4                   | 45.5               | 0.6       | 7.1        | 7.0                      | 3.28                      | 6.84     |
| 2 <sup>a</sup>  | 1.1               | 0.6         | 10.4           | 162.7                  | 45.5               | 0.6       | 7.1        | 6.75                     | 4.73                      | 6.78     |
| 3 <sup>b</sup>  | 1.1               | 0.6         | 10.4           | 102.5                  | 50.5               | 0.6       | 7.3        | 6.75                     | 4.70                      | 6.89     |
| 4 <sup>b</sup>  | 1.1               | 0.6         | 10.4           | 102.5                  | 50.5               | 0.6       | 7.3        | 7.25                     | 4.66                      | 6.90     |
| 5               | 1.1               | 0.6         | 20.0           | 78.9                   | 42.7               | 1.0       | 7.3        | 6.25                     | 5.23                      | 7.18     |
| 6               | 1.1               | 0.1         | 13.7           | 126.9                  | 58.6               | 0.7       | 8.5        | 7.5                      | 1.32                      | 8.32     |
| 7 <sup>b</sup>  | 1.1               | 0.6         | 10.4           | 102.5                  | 50.5               | 0.6       | 7.3        | 7.25                     | 4.56                      | 6.93     |
| 8 <sup>a</sup>  | 1.1               | 0.6         | 16.5           | 87.4                   | 45.5               | 0.6       | 7.1        | 7.5                      | 4.96                      | 6.94     |
| 9               | 1.1               | 0.6         | 0.5            | 126.9                  | 58.6               | 0.7       | 6.0        | 3.75                     | 3.51                      | 4.04     |
| 10              | 1.1               | 1.0         | 7.2            | 78.9                   | 81.8               | 0.4       | 7.3        | 7.0                      | 4.20                      | 5.46     |
| 11              | 0.1               | 0.3         | 7.2            | 78.9                   | 81.8               | 0.4       | 7.3        | 6.75                     | 3.63                      | 4.85     |
| 12              | 1.1               | 0.6         | 10.4           | 102.5                  | 50.5               | 0.1       | 6.0        | 5.0                      | 3.67                      | 4.45     |
| 13              | 2.0               | 0.3         | 7.2            | 78.9                   | 42.7               | 1.0       | 7.3        | 6.25                     | 4.75                      | 4.86     |
| 14              | 0.1               | 0.3         | 16.8           | 55.4                   | 34.8               | 0.4       | 7.3        | 5.0                      | 3.78                      | 4.89     |
| 15              | 1.1               | 0.6         | 10.4           | 5.0                    | 58.6               | 0.7       | 8.5        | 6.75                     | 4.43                      | 7.12     |
| 16              | 0.1               | 0.8         | 13.7           | 126.9                  | 58.6               | 0.7       | 8.5        | 6.75                     | 3.72                      | 5.93     |
| 17              | 1.1               | 0.6         | 10.4           | 102.5                  | 50.5               | 0.1       | 8.5        | 6.0                      | 3.32                      | 6.97     |
| 18              | 1.1               | 0.6         | 20.0           | 173.2                  | 34.8               | 0.4       | 7.3        | 5.25                     | 6.62                      | 7.25     |
| 19 <sup>a</sup> | 1.1               | 0.6         | 10.4           | 102.5                  | 50.5               | 0.9       | 7.1        | 6.0                      | 5.08                      | 6.94     |
| 20              | 2.0               | 0.3         | 7.2            | 173.2                  | 34.8               | 0.4       | 7.3        | 6.5                      | 5.50                      | 5.11     |
| 21              | 0.1               | 0.8         | 13.7           | 126.9                  | 58.6               | 0.7       | 6.0        | 4.75                     | 3.55                      | 4.36     |
| 22 <sup>a</sup> | 1.7               | 0.4         | 8.4            | 87.4                   | 45.5               | 0.6       | 7.1        | 7.75                     | 3.80                      | 7.08     |
| 23              | 0.1               | 0.3         | 7.2            | 173.2                  | 34.8               | 0.4       | 7.3        | 6.25                     | 3.70                      | 4.97     |
| 24              | 2.0               | 0.8         | 13.7           | 126.9                  | 58.6               | 0.7       | 6.0        | 6.5                      | 4.31                      | 4.56     |
| 25              | 1.1               | 0.6         | 20.0           | 78.9                   | 81.8               | 0.4       | 7.3        | 8.5                      | 4.98                      | 7.16     |
| 26              | 1.1               | 1.0         | 16.8           | 55.4                   | 34.8               | 0.4       | 7.3        | 6.75                     | 5.06                      | 5.33     |
| 27 <sup>b</sup> | 1.1               | 0.6         | 10.4           | 102.5                  | 50.5               | 0.6       | 7.3        | 7.5                      | 4.81                      | 6.83     |
| 28 <sup>a</sup> | 1.1               | 0.8         | 8.4            | 87.4                   | 45.5               | 0.6       | 7.1        | 6.75                     | 5.71                      | 6.55     |
| 29              | 1.1               | 1.0         | 7.2            | 173.2                  | 34.8               | 0.4       | 7.3        | 6.75                     | 4.85                      | 5.28     |
| 30              | 2.0               | 0.3         | 7.2            | 78.9                   | 81.8               | 0.4       | 7.3        | 8.0                      | 4.87                      | 5.15     |
| 31              | 2.0               | 0.8         | 13.7           | 126.9                  | 58.6               | 0.7       | 8.5        | 7.75                     | 5.30                      | 6.82     |
| 32              | 1.1               | 0.6         | 10.4           | 200                    | 81.8               | 0.4       | 7.3        | 9.0                      | 4.11                      | 6.69     |
| 33 <sup>a</sup> | 1.1               | 0.6         | 10.4           | 102.5                  | 75.5               | 0.6       | 7.1        | 8.0                      | 4.81                      | 6.79     |
| 34              | 1.1               | 1.0         | 7.2            | 78.9                   | 42.7               | 1.0       | 7.3        | 7.25                     | 4.70                      | 5.25     |
| 35              | 0.1               | 0.3         | 7.2            | 78.9                   | 42.7               | 1.0       | 7.3        | 6.75                     | 3.40                      | 4.89     |
| 36              | 1.1               | 0.1         | 13.7           | 126.9                  | 58.6               | 0.7       | 6.0        | 6.75                     | 2.60                      | 6.26     |
| 37              | 1.1               | 0.6         | 10.4           | 102.5                  | 10.0               | 0.7       | 6.0        | 5.75                     | 3.67                      | 4.54     |
| 38              | 1.1               | 0.1         | 4.0            | 55.4                   | 34.8               | 0.4       | 7.3        | 7.75                     | 1.51                      | 7.43     |
| 39              | 1.1               | 0.6         | 10.4           | 102.5                  | 89.7               | 1.0       | 7.3        | 8.25                     | 4.53                      | 6.92     |
| 40              | 0.1               | 0.8         | 4.0            | 55.4                   | 34.8               | 0.4       | 7.3        | 6.0                      | 4.22                      | 5.76     |
| 41              | 1.1               | 0.6         | 10.4           | 200                    | 42.7               | 1.0       | 7.3        | 7.25                     | 5.04                      | 7.10     |
| 42              | 2.0               | 0.3         | 16.8           | 55.4                   | 34.8               | 0.4       | 7.3        | 7.25                     | 5.80                      | 5.31     |
| 43              | 1.1               | 0.6         | 10.4           | 102.5                  | 10.0               | 0.7       | 8.5        | 5.0                      | 5.19                      | 7.66     |
| 44              | 1.1               | 0.6         | 10.4           | 5.0                    | 58.6               | 0.7       | 6.0        | 7.0                      | 4.30                      | 4.56     |
| 45              | 2.0               | 0.8         | 4.0            | 55.4                   | 34.8               | 0.4       | 7.3        | 7.5                      | 5.73                      | 6.80     |
| 46 <sup>a</sup> | 1.1               | 0.6         | 10.4           | 102.5                  | 50.5               | 0.6       | 8.3        | 7.5                      | 5.21                      | 7.43     |
| 47              | 1.1               | 0.6         | 0.5            | 126.9                  | 58.6               | 0.7       | 8.5        | 7.5                      | 4.16                      | 7.12     |

<sup>a</sup>test points, <sup>b</sup>center points, \*MHT indicates minimal hemagglutination titer detected by MRHA, associated with CFA/I surface expression
