# Supplementary material for: Identification of Novel Components Influencing Colonization Factor Antigen I Expression in Enterotoxigenic Escherichia coli
Source: PubMed Central journal article supplement (PMC4627747; doi:10.1371/journal.pone.0141469), 2015-10-30
Supplement: pone.0141469.s007.pdf [file pone.0141469.s007.pdf]

**Table S3. Significance and deviation of component effects on endpoints as determined by the Hadamard matrix**

| Factor            | CFA/I surface expression |                     |                        | Secreted LT |        |           | Bacterial density |        |           |
|-------------------|--------------------------|---------------------|------------------------|-------------|--------|-----------|-------------------|--------|-----------|
|                   | Coefficient <sup>a</sup> | St Dev <sup>b</sup> | p-val (%) <sup>c</sup> | Coefficient | St Dev | p-val (%) | Coefficient       | St Dev | p-val (%) |
| Glucose           | 0.57                     | 0.111               | 0.09                   | -0.116      | 0.116  | 34.2      | 0.238             | 0.016  | < 0.01    |
| Glycerol          | 0.13                     | 0.113               | 29.2                   | -0.089      | 0.117  | 46.4      | 0.276             | 0.016  | < 0.01    |
| PGM               | 0.89                     | 0.115               | < 0.01                 | -0.391      | 0.117  | 0.85      | 0.287             | 0.016  | < 0.01    |
| Methionine        | -0.06                    | 0.111               | 62.9                   | -0.184      | 0.116  | 14.7      | -0.007            | 0.016  | 65.5      |
| Lysine            | 0.07                     | 0.115               | 56.2                   | 0.222       | 0.117  | 9.0       | -0.132            | 0.016  | 0.02      |
| Aspartic Acid     | 0.25                     | 0.118               | 6.4                    | -0.075      | 0.117  | 53.4      | 0.077             | 0.016  | 0.27      |
| Glutamine         | 0.47                     | 0.115               | 0.34                   | 0.071       | 0.117  | 55.8      | 0.066             | 0.016  | 0.55      |
| Alanine           | 0.16                     | 0.113               | 18.6                   | 0.014       | 0.117  | 91.0      | 0.049             | 0.016  | 1.94      |
| Leucine           | -1.46                    | 0.118               | < 0.01                 | 0.001       | 0.117  | 99.1      | 0.134             | 0.016  | 0.01      |
| MnCl <sub>2</sub> | -0.07                    | 0.115               | 56.2                   | -0.228      | 0.117  | 8.3       | 0.085             | 0.016  | 0.16      |
| CaCl <sub>2</sub> | -0.03                    | 0.115               | 81.5                   | -0.132      | 0.117  | 28.8      | 0.035             | 0.016  | 6.5       |
| ZnCl <sub>2</sub> | -0.55                    | 0.111               | 0.11                   | -0.199      | 0.116  | 11.9      | 0.033             | 0.015  | 7.6       |
| FeSO <sub>4</sub> | 0.54                     | 0.118               | 0.17                   | 0.038       | 0.117  | 75.3      | 0.140             | 0.016  | 0.01      |
| Ammonia           | -0.16                    | 0.111               | 19.1                   | -0.040      | 0.116  | 73.7      | -0.120            | 0.015  | 0.02      |
| Bicarbonate       | 0.37                     | 0.118               | 1.32                   | 0.067       | 0.117  | 57.8      | -0.144            | 0.016  | < 0.01    |
| Norepinephrine    | -0.54                    | 0.113               | 0.13                   | 0.055       | 0.117  | 65.0      | -0.069            | 0.016  | 0.45      |
| Lincomycin        | 1.58                     | 0.118               | < 0.01                 | 0.087       | 0.117  | 47.5      | -0.127            | 0.016  | 0.02      |
| cAMP              | -0.40                    | 0.115               | 0.80                   | 0.047       | 0.117  | 69.5      | -0.035            | 0.016  | 6.5       |
| EGTA              | 0.40                     | 0.115               | 0.80                   | -0.135      | 0.117  | 27.9      | 0.137             | 0.016  | 0.01      |
| 1,10 o-phen.      | -0.81                    | 0.120               | 0.02                   | 0.224       | 0.116  | 8.5       | -0.013            | 0.015  | 43.7      |

<sup>a</sup>Coefficients indicate the relative strength of the response, as shown in Fig 1.

<sup>b</sup>Standard deviation (St Dev)

<sup>c</sup>p-values <5% are considered significant and p-values from 5-10% at the limit of significance.
