# Supplementary material for: Identification of Novel Components Influencing Colonization Factor Antigen I Expression in Enterotoxigenic Escherichia coli
Source: PubMed Central journal article supplement (PMC4627747; doi:10.1371/journal.pone.0141469), 2015-10-30
Supplement: pone.0141469.s008.pdf [file pone.0141469.s008.pdf]

**Table S4. Endpoint association with final pH using Spearman's correlates**

| Endpoint                                          | Variable | Spearman $\rho$ | p-val (%)* |
|---------------------------------------------------|----------|-----------------|------------|
| Bacterial density (OD/mL)                         | Final pH | -0.3671         | 4.6        |
| Surface expressed CFA/I (MHT (log <sub>2</sub> )) | Final pH | 0.1986          | 30.1       |
| Secreted LT (pg/OD)                               | Final pH | -0.0234         | 90.3       |

\*p-values <5% are considered significant
