# Supplementary material for: Identification of Novel Components Influencing Colonization Factor Antigen I Expression in Enterotoxigenic Escherichia coli
Source: PubMed Central journal article supplement (PMC4627747; doi:10.1371/journal.pone.0141469), 2015-10-30
Supplement: pone.0141469.s009.pdf [file pone.0141469.s009.pdf]

**Table S5. Evaluation of component effects and interactions in SP1 media on CFA/I expression and bacterial density**

| <b>A. CFA/I surface expression</b> |                   |                                |                 |                                    | <b>B. Bacterial density</b> |                   |                                |                 |                              |
|------------------------------------|-------------------|--------------------------------|-----------------|------------------------------------|-----------------------------|-------------------|--------------------------------|-----------------|------------------------------|
|                                    | <b>Component</b>  | <b>Coefficient<sup>a</sup></b> | <b>St. Dev.</b> | <b>p-val (%)<sup>*</sup></b>       |                             | <b>Component</b>  | <b>Coefficient<sup>a</sup></b> | <b>St. Dev.</b> | <b>p-val (%)<sup>*</sup></b> |
| Linear                             | <b>Lincomycin</b> | <b>1.382</b>                   | <b>0.212</b>    | <b>&lt; 0.01</b>                   | Linear                      | <b>Glucose</b>    | <b>0.387</b>                   | <b>0.055</b>    | <b>&lt; 0.01</b>             |
|                                    | <b>pH</b>         | <b>0.924</b>                   | <b>0.210</b>    | <b>0.104</b>                       |                             | <b>PGM</b>        | <b>0.278</b>                   | <b>0.054</b>    | <b>0.0340</b>                |
|                                    | <b>PGM</b>        | <b>0.904</b>                   | <b>0.209</b>    | <b>0.118</b>                       |                             | <b>Glutamine</b>  | <b>0.138</b>                   | <b>0.055</b>    | <b>3.03</b>                  |
|                                    | EGTA              | 0.352                          | 0.212           | 12.6                               |                             | <b>Lincomycin</b> | <b>-0.104</b>                  | <b>0.055</b>    | <b>8.6</b>                   |
|                                    | Glucose           | -0.197                         | 0.212           | 37.4                               |                             | EGTA              | 0.043                          | 0.055           | 45.3                         |
|                                    | Glutamine         | 0.118                          | 0.213           | 59.1                               |                             | pH                | 0.032                          | 0.055           | 56.5                         |
|                                    | FeSO <sub>4</sub> | -0.123                         | 0.212           | 57.2                               |                             | FeSO <sub>4</sub> | 0.005                          | 0.055           | 93.5                         |
| Squared                            | <b>pH</b>         | <b>-2.374</b>                  | <b>0.462</b>    | <b>0.032</b>                       | Squared                     | <b>Glucose</b>    | <b>-0.747</b>                  | <b>0.121</b>    | <b>&lt; 0.01</b>             |
|                                    | <b>Glutamine</b>  | <b>-1.081</b>                  | <b>0.460</b>    | <b>3.84</b>                        |                             | <b>pH</b>         | <b>-0.587</b>                  | <b>0.120</b>    | <b>0.049</b>                 |
|                                    | PGM               | -0.926                         | 0.448           | 6.3                                |                             | <b>PGM</b>        | <b>0.239</b>                   | <b>0.117</b>    | <b>6.6</b>                   |
|                                    | EGTA              | -0.864                         | 0.443           | 7.7                                |                             | FeSO <sub>4</sub> | 0.137                          | 0.115           | 25.7                         |
|                                    | FeSO <sub>4</sub> | 0.754                          | 0.441           | 11.5                               |                             | Glutamine         | 0.110                          | 0.120           | 37.8                         |
|                                    | Glucose           | 0.639                          | 0.463           | 19.5                               |                             | Lincomycin        | 0.090                          | 0.117           | 45.7                         |
|                                    | Lincomycin        | 0.172                          | 0.447           | 70.8                               |                             | EGTA              | -0.078                         | 0.115           | 51.4                         |
| <b>Glutamine-Lincomycin</b>        | <b>2.745</b>      | <b>0.661</b>                   | <b>0.16</b>     | <b>Glucose-pH</b>                  | <b>0.472</b>                | <b>0.167</b>      | <b>1.66</b>                    |                 |                              |
| <b>Glutamine-pH</b>                | <b>-2.020</b>     | <b>0.641</b>                   | <b>0.92</b>     | <b>FeSO<sub>4</sub>-Lincomycin</b> | <b>-0.433</b>               | <b>0.169</b>      | <b>2.68</b>                    |                 |                              |
| <b>Lincomycin-pH</b>               | <b>1.982</b>      | <b>0.641</b>                   | <b>1.02</b>     | <b>Lincomycin-pH</b>               | <b>-0.319</b>               | <b>0.167</b>      | <b>8.3</b>                     |                 |                              |
| <b>FeSO<sub>4</sub>-pH</b>         | <b>1.888</b>      | <b>0.641</b>                   | <b>1.33</b>     | <b>Glutamine-Lincomycin</b>        | <b>-0.310</b>               | <b>0.172</b>      | <b>9.9</b>                     |                 |                              |
| <b>FeSO<sub>4</sub>-Lincomycin</b> | <b>1.719</b>      | <b>0.650</b>                   | <b>2.28</b>     | Glutamine-EGTA                     | -0.210                      | 0.173             | 25.0                           |                 |                              |
| <b>PGM-EGTA</b>                    | <b>-1.420</b>     | <b>0.643</b>                   | <b>4.93</b>     | Glucose-Lincomycin                 | -0.201                      | 0.172             | 26.8                           |                 |                              |
| <b>PGM-Glutamine</b>               | <b>1.150</b>      | <b>0.628</b>                   | <b>9.4</b>      | Glutamine-pH                       | -0.192                      | 0.167             | 27.4                           |                 |                              |
| PGM-FeSO <sub>4</sub>              | -0.857            | 0.637                          | 20.5            | Glucose-Glutamine                  | -0.185                      | 0.168             | 29.3                           |                 |                              |
| PGM-Glucose                        | 0.729             | 0.607                          | 25.5            | Glucose-FeSO <sub>4</sub>          | -0.149                      | 0.171             | 40.1                           |                 |                              |
| Glucose-Lincomycin                 | -0.721            | 0.660                          | 29.8            | EGTA-pH                            | 0.138                       | 0.167             | 42.6                           |                 |                              |
| Glucose-pH                         | 0.690             | 0.641                          | 30.5            | FeSO <sub>4</sub> -EGTA            | -0.140                      | 0.170             | 42.8                           |                 |                              |
| Glucose-EGTA                       | 0.606             | 0.663                          | 38.0            | PGM-pH                             | 0.124                       | 0.167             | 47.2                           |                 |                              |
| PGM-pH                             | -0.512            | 0.641                          | 44.1            | PGM-Lincomycin                     | -0.110                      | 0.167             | 52.4                           |                 |                              |
| FeSO <sub>4</sub> -EGTA            | 0.517             | 0.651                          | 44.4            | PGM-Glucose                        | -0.087                      | 0.158             | 59.2                           |                 |                              |
| Glucose-Glutamine                  | 0.460             | 0.642                          | 48.9            | PGM-EGTA                           | -0.062                      | 0.168             | 71.8                           |                 |                              |
| Glutamine-EGTA                     | 0.315             | 0.664                          | 64.4            | Glutamine-FeSO <sub>4</sub>        | -0.052                      | 0.171             | 76.7                           |                 |                              |
| PGM-Lincomycin                     | 0.192             | 0.641                          | 77.0            | PGM-Glutamine                      | 0.044                       | 0.164             | 79.5                           |                 |                              |
| EGTA-pH                            | 0.112             | 0.641                          | 86.5            | FeSO <sub>4</sub> -pH              | -0.033                      | 0.167             | 84.8                           |                 |                              |
| Glutamine-FeSO <sub>4</sub>        | -0.096            | 0.657                          | 88.6            | Lincomycin-EGTA                    | -0.007                      | 0.173             | 96.9                           |                 |                              |
| Glucose-FeSO <sub>4</sub>          | 0.095             | 0.654                          | 88.7            | Glucose-EGTA                       | 0.006                       | 0.173             | 97.2                           |                 |                              |
| Lincomycin-EGTA                    | 0.081             | 0.664                          | 90.5            | PGM-FeSO <sub>4</sub>              | -0.003                      | 0.166             | 98.5                           |                 |                              |

<sup>a</sup>Coefficients indicate the relative strength of the response, which may be linear (top), squared (middle), or dependent on interactions (bottom).

\*p-values <5% are considered significant while p-values from 5-10% are at the limit of significance (bold)
